# Supplementary material for: Cytoplasmic–Nuclear Incompatibility Between Wild Isolates of Caenorhabditis nouraguensis
Source: PubMed Central journal article supplement (PMC5345712; doi:10.1534/g3.116.037101), 2017-01-05
Supplement: 823FigureS1.pdf [file 823FigureS1.pdf]

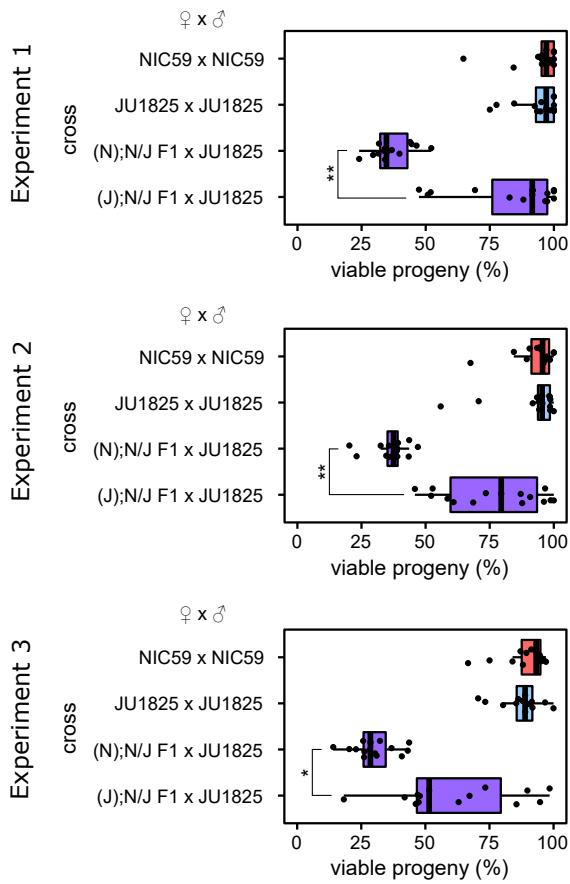

**Figure S1. Variability of (J); N/J F1 female x JU1825 male crosses across experiments.**

Three biological replicates of the same type of backcross experiment. (J); N/J F1 female x JU1825 male crosses can either exhibit similar or significantly decreased rates of viability in comparison to intra-strain crosses (Experiment 1, non-significant,  $P > 0.05$ ; Experiment 2, non-significant,  $P > 0.05$ ; Experiment 3,  $P > 0.05$ , non-significant in comparison to JU1825 x JU1825 crosses,  $P < 0.05$  significant in comparison to NIC59 x NIC59 crosses). However, (J); N/J F1 female x JU1825 male crosses consistently exhibit significantly increased rates of viability in comparison to (N); N/J female x JU1825 male crosses (Experiment 1, \*\*,  $P < 0.01$ ; Experiment 2, \*\*,  $P < 0.01$ ; Experiment 3, \*,  $P < 0.05$ ). Experiments 1 and 2 are data from Figures 2 and 5, respectively. All p-values were calculated by a Kruskal-Wallis test followed by Dunn's test.
